# Supplementary material for: Development of a predictive model for identifying women vulnerable to HIV in Chicago
Source: BMC Womens Health. 2023 Jun 16;23:313. doi: 10.1186/s12905-023-02460-7 (PMC10276380; doi:10.1186/s12905-023-02460-7)
Supplement: Supplementary file 1 — Additional File Table 1: ICD9/10 codes used to determine disease diagnoses [file 12905_2023_2460_MOESM1_ESM.xlsx]

## Sheet: Sheet1
Supplemental Table 1. ICD9/10 codes used to determine disease diagnoses
Variable	Explanation	Values	ICD9/10 Codes
Dependent alcohol use diagnosis in the last two years	Any diagnosis of dependent alcohol use in the two years prior to either HIV diagnosis or last encounter	Yes, dependent alcohol use diagnosis code	ICD9 codes including: [1] "291.81" [2] "291.89" [3] "303.00" [4] "303.01" [5] "303.02" [6] "303.90" [7] "303.91" [8] "303.92" [9] "303.93" [10] "305.00" [11] "305.01" [12] "305.02" [13] "305.03" [14] "535.30" [15] "535.31" [16] "760.71" ICD10 codes including: [1] "F10.10" [2] "F10.120" [3] "F10.121" [4] "F10.129" [5] "F10.14” [6] "F10.159" [7] "F10.182" [8] "F10.188" [9] "F10.19" [10] "F10.20" [1…
		No dependent alcohol use diagnosis code
Hepatitis C diagnosis in the last two years	Any diagnosis of Hepatitis C in the two years prior to either HIV diagnosis or last encounter	Yes, Hepatitis C diagnosis code	ICD9 codes including: [1] "070.41" [2] "070.44" [3] "070.51" [4] "070.54" [5] "070.70" [6] "070.71" ICD10 codes including: [1] "B17.10" [2] "B17.11" [3] "B18.2" [4] "B19.20" [5] "B19.21"
		No Hepatitis C diagnosis code
Mental Health diagnosis in the last two years	Any mental health diagnosis in the two years prior to either HIV diagnosis or last encounter	Yes, mental health diagnosis code	ICD9 codes including: [1] "290.10" [2] "293.81" [3] "293.82" [4] "293.83" [5] "293.84" [6] "293.89" [7] "295.00" [8] "295.02" [9] "295.10" [10] "295.12" [11] "295.20" [12] "295.23" [13] "295.30" [14] "295.31" [15] "295.32" [16] "295.34" [17] "295.35" [18] "295.40" [19] "295.42" [20] "295.44" [21] "295.50" [22] "295.55" [23] "295.60" [24] "295.62" [25] "295.64" [26] "295.70" [27] "295.72" [28] "29…
		No mental health diagnosis code
Pregnancy diagnosis in the last two years	Any diagnosis of pregnancy in the two years prior to either HIV diagnosis or last encounter	Yes, pregnancy diagnosis code	ICD9 codes including: [1] "634.01" [2] "634.02" [3] "634.11" [4] "634.12" [5] "634.31" [6] "634.41" [7] "634.71" [8] "634.72" [9] "634.81" [10] "634.90" [11] "634.91" [12] "634.92" [13] "635.11" [14] "635.12" [15] "635.32" [16] "635.71" [17] "635.72" [18] "635.90" [19] "635.91" [20] "635.92" [21] "637.01" [22] "637.71" [23] "637.90" [24] "637.91" [25] "637.92" [26] "640.00" [27] "640.01" [28] "64…
		No pregnancy diagnosis code
Any substance abuse diagnosis in the last two years	Any diagnosis of substance abuse in the two years prior to either HIV diagnosis or last encounter	Yes, substance abuse diagnosis code	ICD9 codes including: [1] "292.11" [2] "292.12" [3] "292.81" [4] "292.83" [5] "292.84" [6] "292.85" [7] "292.89" [8] "304.00" [9] "304.01" [10] "304.02" [11] "304.03" [12] "304.10" [13] "304.11" [14] "304.12" [15] "304.13" [16] "304.20" [17] "304.21" [18] "304.22" [19] "304.23" [20] "304.30" [21] "304.31" [22] "304.32" [23] "304.33" [24] "304.40" [25] "304.41" [26] "304.42" [27] "304.43" [38] "30…
		No substance abuse diagnosis code
Sexually transmitted disease diagnosis (Chlamydia, Gonorrhea, Syphilis)	Any diagnosis of an STI (syphilis, chlamydia, gonorrhea) in the two years prior to either HIV diagnosis or last encounter	Yes, STI diagnosis code	ICD9 codes including: [[1] "054.10" [2] "054.11" [3] "054.12" [4] "054.13" [5] "054.19" [6] "079.88" [7] "079.98" [8] "091.50" [9] "091.51" [10] "091.52" [11] "091.69" [12] "091.89" [13] "093.89" [14] "094.83" [15] "094.84" [16] "094.85" [17] "094.89" [18] "098.10" [19] "098.13" [20] "098.15" [21] "098.16" [22] "098.50" [23] "098.51" [24] "098.59" [25] "098.89" [26] "099.40" [27] "099.41" [28] "0…
		No STI diagnosis code
